# Supplementary material for: Assessing Uncertainty in High-Resolution Spatial Climate Data across the US Northeast
Source: PubMed Central journal article supplement (PMC3731317; doi:10.1371/journal.pone.0070260), 2013-08-01
Supplement: pone.0070260.s001.pdf [file pone.0070260.s001.pdf]

| <i>Station Name</i>        | <i>Acronym</i> | <i>Station ID</i> | <i>Longitude</i> | <i>Latitude</i> | <i>Elevation (m)</i> | <i>Coastal Distance (m)</i> |
|----------------------------|----------------|-------------------|------------------|-----------------|----------------------|-----------------------------|
| Rochester, MA              | R-MA           | 196938            | -70.918          | 41.785          | 19.8                 | 20377.3                     |
| Norton, MA                 | N-MA           | 195984            | -71.167          | 41.993          | 29                   | 27870.3                     |
| Maynard, MA                | M-MA           | 194580            | -71.442          | 42.429          | 62.5                 | 41850.2                     |
| Corinna, ME                | C-ME           | 171628            | -69.242          | 44.92           | 90.5                 | 57896.8                     |
| Woodland, ME               | W-ME           | 179891            | -67.404          | 45.157          | 42.7                 | 29510.4                     |
| Millinocket, ME            | Mi-ME          | 175304            | -68.705          | 45.65           | 109.7                | 123193.7                    |
| Brassua Dam, ME            | BD-ME          | 170814            | -69.812          | 45.66           | 323.1                | 148289.6                    |
| East Hiram, ME             | EH-ME          | 172238            | -70.754          | 43.879          | 160.9                | 52358                       |
| Middle Dam, ME             | MD-ME          | 175261            | -70.917          | 44.793          | 445                  | 130123.1                    |
| Madison, ME                | M-ME           | 174927            | -69.888          | 44.798          | 79.2                 | 88515.7                     |
| Rangeley, ME               | R-ME           | 177037            | -70.672          | 44.989          | 466.3                | 137449.2                    |
| Grand Lake Stream, ME      | GLS-ME         | 173261            | -67.774          | 45.178          | 88.4                 | 58922.6                     |
| Long Falls Dam, ME         | LFD-ME         | 171870            | -70.198          | 45.222          | 353.6                | 132888.1                    |
| Jackman, ME                | J-ME           | 174086            | -70.255          | 45.623          | 362.7                | 166538.7                    |
| Van Buren, ME              | VB-ME          | 178965            | -67.94           | 47.166          | 139                  | 226558.4                    |
| First Connecticut Lake, NH | FCL-NH         | 272999            | -71.287          | 45.087          | 506                  | 171519.1                    |
| North Conway, NH           | NC-NH          | 275995            | -71.138          | 44.03           | 165.8                | 85295.3                     |
| Pinkham Notch, NH          | PN-NH          | 276818            | -71.255          | 44.263          | 612.6                | 107147                      |
| Berlin, NH                 | B-NH           | 270690            | -71.184          | 44.449          | 283.5                | 113247.5                    |
| Charlotteburg Rsvr, NJ     | CR-NJ          | 281582            | -74.423          | 41.035          | 231.6                | 44049                       |
| Canoe Brook, NJ            | CB-NJ          | 281335            | -74.354          | 40.744          | 54.9                 | 19626.6                     |
| Walden, NY                 | W-NY           | 308906            | -74.163          | 41.551          | 115.8                | 76562                       |
| Ithaca Cornell, NY         | IC-NY          | 304174            | -76.449          | 42.449          | 292.6                | 271005.8                    |
| Dansville, NY              | D-NY           | 301974            | -77.718          | 42.566          | 201.2                | 363900.3                    |
| Troy L&D, NY               | TLD-NY         | 308600            | -73.683          | 42.75           | 7.3                  | 172141.4                    |
| Indian Lake, NY            | IL-NY          | 304102            | -74.269          | 43.755          | 506                  | 296603.7                    |
| Lowville, NY               | L-NY           | 304912            | -75.482          | 43.797          | 262.1                | 344518.8                    |
| Canton, NY                 | C-NY           | 301185            | -75.11           | 44.577          | 136.6                | 393935.4                    |
| Little Valley, NY          | LV-NY          | 304808            | -78.812          | 42.247          | 495.3                | 424676                      |
| Alcove Dam, NY             | AD-NY          | 300063            | -73.927          | 42.47           | 185                  | 156572.7                    |

|                             |         |        |         |        |       |          |
|-----------------------------|---------|--------|---------|--------|-------|----------|
| Aurora Rsch Farm, NY        | ARF-NY  | 300331 | -76.659 | 42.734 | 253   | 304827.3 |
| Canandaigua, NY             | Ca-NY   | 301152 | -77.281 | 42.845 | 219.5 | 352837.4 |
| Avon, NY                    | A-NY    | 300343 | -77.756 | 42.92  | 166.1 | 390725   |
| Boonville, NY               | B-NY    | 300785 | -75.37  | 43.436 | 472.4 | 303537.1 |
| State College, PA           | SC-PA   | 368449 | -77.867 | 40.793 | 356.6 | 307362.4 |
| Ridgway, PA                 | R-PA    | 367477 | -78.75  | 41.42  | 414.5 | 393937.1 |
| Pleasant Mt, PA             | PM-PA   | 367029 | -75.446 | 41.739 | 548.6 | 157578.5 |
| Montrose, PA                | M-PA    | 365915 | -75.858 | 41.851 | 432.8 | 193204.4 |
| Warren, PA                  | W-PA    | 369298 | -79.15  | 41.85  | 368.8 | 436194.4 |
| Selinsgrove, PA             | S-PA    | 367931 | -76.861 | 40.783 | 128   | 223297.3 |
| Hamburg, PA                 | H-PA    | 363632 | -75.995 | 40.552 | 116.7 | 148427.8 |
| Ford City, PA               | FC-PA   | 362942 | -79.5   | 40.717 | 283.5 | 446815.4 |
| Butler, PA                  | B-PA    | 361139 | -79.917 | 40.85  | 304.8 | 482195.6 |
| Putneyville, PA             | P-PA    | 367229 | -79.282 | 40.925 | 390.1 | 426908.1 |
| Lock Haven Sewege Plant, PA | LHSP-PA | 365109 | -77.45  | 41.117 | 172.5 | 277381.8 |
| Renovo, PA                  | Re-PA   | 367409 | -77.738 | 41.33  | 201.2 | 306457.9 |
| Stevenson Dam, PA           | SD-PA   | 368469 | -78.017 | 41.4   | 284.1 | 332315.8 |
| Titusville Wtr Works, PA    | TWW-PA  | 368888 | -79.7   | 41.633 | 371.9 | 473306.2 |
| Kane, PA                    | K-PA    | 364432 | -78.804 | 41.677 | 533.4 | 404431.7 |
| Bradford, PA                | Br-PA   | 360868 | -78.714 | 41.898 | 506   | 404869   |
| Cavendish, VT               | C-VT    | 431243 | -72.599 | 43.385 | 256.6 | 161322.1 |
