# Supplementary material for: Assessing Uncertainty in High-Resolution Spatial Climate Data across the US Northeast
Source: PubMed Central journal article supplement (PMC3731317; doi:10.1371/journal.pone.0070260), 2013-08-01
Supplement: pone.0070260.s002.pdf [file pone.0070260.s002.pdf]

Table S2.1. NRCC Mean Tmax prediction error model(s) within 2 corrected Akaike Information Criterion (AICc) units of lowest AIC among 13 candidate general linear models over US Northeast, sorted by  $\Delta AICc$ , with Akaike weights and coefficient of determination (R2), for a) Winter, b) Spring, c) Summer, d) Fall.

a) Winter (DJF)

| Model          | $\Delta AICc$ | Weight | R2   |
|----------------|---------------|--------|------|
| Lat+Coast*Elev | 0.0           | 0.74   | 0.98 |

b) Spring (MAM)

| Model      | $\Delta AICc$ | Weight | R2   |
|------------|---------------|--------|------|
| Null       | 0.0           | 0.26   | 0.00 |
| Coast      | 1.1           | 0.15   | 0.02 |
| Elev+Coast | 1.7           | 0.11   | 0.05 |
| Elev       | 1.8           | 0.11   | 0.01 |

c) Summer (JJA)

| Model          | $\Delta AICc$ | Weight | R2   |
|----------------|---------------|--------|------|
| Coast*Elev     | 0.0           | 0.57   | 0.37 |
| Lat+Coast*Elev | 1.2           | 0.30   | 0.39 |

d) Fall (SON)

| Model          | $\Delta AICc$ | Weight | R2   |
|----------------|---------------|--------|------|
| Coast*Elev     | 0.0           | 0.58   | 0.41 |
| Lat+Coast*Elev | 1.9           | 0.23   | 0.42 |

Table S2.2. NRCC Mean Tmin prediction error model(s) within 2 corrected Akaike Information Criterion (AICc) units of lowest AIC among 13 candidate general linear models over US Northeast, sorted by  $\Delta AICc$ , with Akaike weights and coefficient of determination (R2), for a) Winter, b) Spring, c) Summer, d) Fall.

a) Winter (DJF)

| Model     | $\Delta AICc$ | Weight | R2     |
|-----------|---------------|--------|--------|
| Null      | 0.0           | 0.25   | 0.00   |
| Coast     | 0.4           | 0.21   | 0.03   |
| Lat+Coast | 1.6           | 0.12   | 0.06   |
| Lat       | 2.0           | 0.09   | < 0.01 |

b) Spring (MAM)

| Model          | $\Delta AICc$ | Weight | R2   |
|----------------|---------------|--------|------|
| Lat+Elev+Coast | 0.0           | 0.29   | 0.15 |
| Lat            | 1.1           | 0.13   | 0.05 |
| Null           | 1.5           | 0.10   | 0.00 |
| Lat+Coast      | 1.6           | 0.10   | 0.09 |
| Lat+Coast*Elev | 1.6           | 0.10   | 0.17 |

c) Summer (JJA)

| Model          | $\Delta AICc$ | Weight | R2   |
|----------------|---------------|--------|------|
| Lat+Elev+Coast | 0.0           | 0.23   | 0.17 |
| Elev+Coast     | 1.1           | 0.13   | 0.11 |
| Lat+Coast*Elev | 1.4           | 0.11   | 0.19 |
| Elev           | 1.7           | 0.10   | 0.05 |
| Coast+Elev*Lat | 1.9           | 0.09   | 0.18 |

d) Fall (SON)

| Model          | $\Delta AICc$ | Weight | R2   |
|----------------|---------------|--------|------|
| Lat+Elev+Coast | 0.0           | 0.20   | 0.16 |
| Lat+Coast      | 0.4           | 0.16   | 0.11 |
| Lat            | 0.8           | 0.14   | 0.06 |
| Lat+Coast*Elev | 1.0           | 0.12   | 0.18 |
| Null           | 1.7           | 0.09   | 0.00 |

Table S2.3. PRISM Mean Tmax prediction error model(s) within 2 corrected Akaike Information Criterion (AICc) units of lowest AIC among 13 candidate general linear models over US Northeast, sorted by  $\Delta AICc$ , with Akaike weights and coefficient of determination (R2), for a) Winter, b) Spring, c) Summer, d) Fall.

| a) Winter (DJF) |               |        |      | b) Spring (MAM) |               |        |      |
|-----------------|---------------|--------|------|-----------------|---------------|--------|------|
| Model           | $\Delta AICc$ | Weight | R2   | Model           | $\Delta AICc$ | Weight | R2   |
| Null            | 0.0           | 0.34   | 0.00 | Null            | 0.0           | 0.20   | 0.00 |
| Coast           | 1.7           | 0.14   | 0.01 | Coast*Elev      | 0.5           | 0.16   | 0.12 |
|                 |               |        |      | Coast           | 0.9           | 0.13   | 0.03 |
|                 |               |        |      | Lat+Coast*Elev  | 1.9           | 0.08   | 0.14 |
|                 |               |        |      | Elev+Coast      | 1.9           | 0.08   | 0.05 |
|                 |               |        |      | Elev            | 2.0           | 0.08   | 0.01 |

  

| c) Summer (JJA) |               |        |      | d) Fall (SON) |               |        |      |
|-----------------|---------------|--------|------|---------------|---------------|--------|------|
| Model           | $\Delta AICc$ | Weight | R2   | Model         | $\Delta AICc$ | Weight | R2   |
| Null            | 0.0           | 0.24   | 0.00 | Null          | 0.0           | 0.29   | 0.00 |
| Coast           | 0.8           | 0.16   | 0.03 | Elev          | 1.7           | 0.12   | 0.01 |
| Elev*Lat        | 0.9           | 0.15   | 0.11 | Elev*Lat      | 1.9           | 0.11   | 0.10 |

Table S2.4. PRISM Mean Tmin prediction error model(s) within 2 corrected Akaike Information Criterion (AICc) units of lowest AIC among 13 candidate general linear models over US Northeast, sorted by  $\Delta AICc$ , with Akaike weights and coefficient of determination (R2), for a) Winter, b) Spring, c) Summer, d) Fall.

| a) Winter (DJF) |               |        |      | b) Spring (MAM) |               |        |      |
|-----------------|---------------|--------|------|-----------------|---------------|--------|------|
| Model           | $\Delta AICc$ | Weight | R2   | Model           | $\Delta AICc$ | Weight | R2   |
| Null            | 0.0           | 0.35   | 0.00 | Null            | 0.0           | 0.21   | 0.00 |
| Coast           | 1.7           | 0.15   | 0.01 | Lat             | 0.7           | 0.14   | 0.03 |
|                 |               |        |      | Lat+Coast       | 0.8           | 0.14   | 0.07 |
|                 |               |        |      | Coast           | 1.4           | 0.10   | 0.02 |

  

| c) Summer (JJA) |               |        |      | d) Fall (SON) |               |        |      |
|-----------------|---------------|--------|------|---------------|---------------|--------|------|
| Model           | $\Delta AICc$ | Weight | R2   | Model         | $\Delta AICc$ | Weight | R2   |
| Null            | 0.0           | 0.25   | 0.00 | Null          | 0.0           | 0.28   | 0.00 |
| Coast           | 1.1           | 0.15   | 0.02 | Elev          | 1.8           | 0.11   | 0.01 |
| Elev*Lat        | 1.7           | 0.11   | 0.10 | Coast         | 1.9           | 0.11   | 0.01 |

Table S2.5. NRCC Tmax Trend prediction error model(s) within 2 corrected Akaike Information Criterion (AICc) units of lowest AIC among 13 candidate general linear models over US Northeast, sorted by  $\Delta AICc$ , with Akaike weights and coefficient of determination (R2), for a) Winter, b) Spring, c) Summer, d) Fall.

a) Winter (DJF)

| Model      | $\Delta AICc$ | Weight | R2   |
|------------|---------------|--------|------|
| Null       | 0.0           | 0.22   | 0.00 |
| Elev+Coast | 0.8           | 0.15   | 0.07 |
| Elev       | 1.1           | 0.12   | 0.02 |
| Coast      | 1.3           | 0.12   | 0.01 |
| Lat        | 1.7           | 0.10   | 0.01 |
| Coast*Elev | 2.0           | 0.08   | 0.09 |

b) Spring (MAM)

| Model      | $\Delta AICc$ | Weight | R2   |
|------------|---------------|--------|------|
| Coast*Elev | 0.0           | 0.43   | 0.21 |

c) Summer (JJA)

| Model    | $\Delta AICc$ | Weight | R2   |
|----------|---------------|--------|------|
| Elev     | 0.0           | 0.40   | 0.13 |
| Lat+Elev | 2.0           | 0.15   | 0.13 |

d) Fall (SON)

| Model      | $\Delta AICc$ | Weight | R2   |
|------------|---------------|--------|------|
| Elev       | 0.0           | 0.31   | 0.10 |
| Elev+Coast | 1.1           | 0.18   | 0.12 |

Table S2.6. NRCC Tmin Trend prediction error model(s) within 2 corrected Akaike Information Criterion (AICc) units of lowest AIC among 13 candidate general linear models over US Northeast, sorted by  $\Delta AICc$ , with Akaike weights and coefficient of determination (R2), for a) Winter, b) Spring, c) Summer, d) Fall.

a) Winter (DJF)

| Model    | $\Delta AICc$ | Weight | R2   |
|----------|---------------|--------|------|
| Lat      | 0.0           | 0.28   | 0.06 |
| Null     | 1.1           | 0.16   | 0.00 |
| Lat+Elev | 1.5           | 0.13   | 0.08 |

b) Spring (MAM)

| Model    | $\Delta AICc$ | Weight | R2   |
|----------|---------------|--------|------|
| Lat      | 0.0           | 0.41   | 0.10 |
| Lat+Elev | 2.0           | 0.15   | 0.11 |

c) Summer (JJA)

| Model     | $\Delta AICc$ | Weight | R2   |
|-----------|---------------|--------|------|
| Null      | 0.0           | 0.23   | 0.00 |
| Lat       | 0.2           | 0.21   | 0.04 |
| Elev      | 1.4           | 0.11   | 0.02 |
| Lat+Elev  | 1.7           | 0.10   | 0.06 |
| Lat+Coast | 2.0           | 0.08   | 0.05 |

d) Fall (SON)

| Model | $\Delta AICc$ | Weight | R2   |
|-------|---------------|--------|------|
| Null  | 0.0           | 0.32   | 0.00 |
| Lat   | 0.8           | 0.22   | 0.03 |
| Coast | 2.0           | 0.12   | 0.01 |

Table S2.7. PRISM Tmax Trend prediction error model(s) within 2 corrected Akaike Information Criterion (AICc) units of lowest AIC among 13 candidate general linear models over US Northeast, sorted by  $\Delta AICc$ , with Akaike weights and coefficient of determination (R2), for a) Winter, b) Spring, c) Summer, d) Fall.

| a) Winter (DJF) |               |        |      | b) Spring (MAM) |               |        |      |
|-----------------|---------------|--------|------|-----------------|---------------|--------|------|
| Model           | $\Delta AICc$ | Weight | R2   | Model           | $\Delta AICc$ | Weight | R2   |
| Elev            | 0.0           | 0.26   | 0.06 | Elev            | 0.0           | 0.28   | 0.09 |
| Null            | 1.0           | 0.15   | 0.00 | Elev*Lat        | 1.0           | 0.17   | 0.15 |
| Coast           | 1.4           | 0.13   | 0.04 | Elev+Coast      | 1.2           | 0.15   | 0.11 |
| Elev+Coast      | 1.9           | 0.10   | 0.07 |                 |               |        |      |

  

| c) Summer (JJA) |               |        |      | d) Fall (SON) |               |        |      |
|-----------------|---------------|--------|------|---------------|---------------|--------|------|
| Model           | $\Delta AICc$ | Weight | R2   | Model         | $\Delta AICc$ | Weight | R2   |
| Elev*Lat        | 0.0           | 0.29   | 0.18 | Elev          | 0.0           | 0.27   | 0.06 |
| Elev            | 1.2           | 0.16   | 0.07 | Null          | 1.1           | 0.15   | 0.00 |
| Lat+Elev        | 1.8           | 0.12   | 0.11 | Elev+Coast    | 1.7           | 0.18   | 0.08 |
|                 |               |        |      | Elev*Lat      | 1.8           | 0.11   | 0.12 |
|                 |               |        |      | Lat+Elev      | 2.0           | 0.10   | 0.07 |

Table S2.8. PRISM Tmin Trend prediction error model(s) within 2 corrected Akaike Information Criterion (AICc) units of lowest AIC among 13 candidate general linear models over US Northeast, sorted by  $\Delta AICc$ , with Akaike weights and coefficient of determination (R2), for a) Winter, b) Spring, c) Summer, d) Fall.

| a) Winter (DJF) |               |        |      | b) Spring (MAM) |               |        |      |
|-----------------|---------------|--------|------|-----------------|---------------|--------|------|
| Model           | $\Delta AICc$ | Weight | R2   | Model           | $\Delta AICc$ | Weight | R2   |
| Null            | 0.0           | 0.37   | 0.00 | Null            | 0.0           | 0.36   | 0.00 |
| Elev            | 1.7           | 0.16   | 0.01 | Elev            | 1.7           | 0.15   | 0.01 |
| Lat             | 2.0           | 0.14   | 0.01 | Coast           | 2.0           | 0.13   | 0.01 |

  

| c) Summer (JJA) |               |        |        | d) Fall (SON) |               |        |      |
|-----------------|---------------|--------|--------|---------------|---------------|--------|------|
| Model           | $\Delta AICc$ | Weight | R2     | Model         | $\Delta AICc$ | Weight | R2   |
| Null            | 0.0           | 0.38   | 0.00   | Null          | 0.0           | 0.31   | 0.00 |
| Lat             | 1.8           | 0.16   | 0.01   | Lat           | 1.1           | 0.18   | 0.02 |
| Coast           | 2.0           | 0.14   | < 0.01 | Elev          | 1.6           | 0.14   | 0.01 |
